# Supplementary material for: Lung cancer risk discrimination of prediagnostic proteomics measurements compared with existing prediction tools
Source: PubMed Central journal article supplement — J Natl Cancer Inst. 2023 Jun 1;115(9):1050–9. doi: 10.1093/jnci/djad071 (PMC10483263; doi:10.1093/jnci/djad071), 2023-06-01

## Supplementary Materials

### Supplementary Methods

**Imputation of missing covariate data:** We first imputed missing information for demographic, smoking, and health-related covariates needed to implement a standard smoking-based lung cancer risk prediction model, PLCOm2012. We assigned the mean value within each cohort for the participants who missed BMI (0.6% of study participants missing BMI). For the partially missing variables (education, smoking duration, smoking intensity, and years since quitting for former smokers), we stratified the imputation procedure by cohort and smoking status (current or former) and applied multiple imputation by chained equations (MICE). In NSHDS (Sweden), smoking intensity information was not available for people who used to smoke, nor for some people who currently smoke. We therefore additionally combined HUNT (Norway) with NSHDS to impute the smoking intensity for participants in NSHDS. We assigned history of chronic obstructive pulmonary disease (COPD) or emphysema, first-degree family history of lung cancer, and personal history of cancer as null for all participants from cohorts that did not collect information about these variables. The detailed missingness distribution are presented in Supplementary Table 1.

**R packages used for analysis:** The R package "glmnet" was applied to perform the Lasso logistic regression analysis for multiprotein analyses,[1] "pROC" was applied for the AUC calculation, comparison and adjustment of cut-point for the protein-based risk model that yields the same specificity as EarlyCDT®-Lung,[2] and "DTComPair" was used for the McNemar test.[3]

## References:

1. Friedman J, Hastie T, Tibshirani R. Regularization Paths for Generalized Linear Models via Coordinate Descent. *J Stat Softw* 2010;33(1):1-22.
2. Robin X, Turck N, Hainard A, *et al.* pROC: an open-source package for R and S+ to analyze and compare ROC curves. *BMC Bioinformatics* 2011;12:77.
3. Christian Stock, Hielscher T. *DTComPair: comparison of binary diagnostic tests in a paired study design*. <http://CRAN.R-project.org/package=DTComPair>.

**Supplementary Table 1.** Characteristics of the study participants before imputation.

|                                            | <b>CPS</b><br>(N=228) | <b>HUNT</b><br>(N=324) | <b>MCCS</b><br>(N=208) | <b>SCHS</b><br>(N=180) | <b>EPIC</b><br>(N=180) | <b>NSHDS</b><br>(N=128) | <b>Total</b><br>(N=1248) |
|--------------------------------------------|-----------------------|------------------------|------------------------|------------------------|------------------------|-------------------------|--------------------------|
| <b>Age, Median (Q1-Q3)</b>                 | 71 (67 - 74)          | 68 (60 - 73)           | 67 (62 - 73)           | 69 (65 - 74)           | 57 (53 - 63)           | 60 (57 - 60)            | 66 (60 - 72)             |
| <b>Female participants (%)</b>             | 84 (36.8%)            | 122 (37.7%)            | 64 (30.8%)             | 20 (11.1%)             | 60 (33.3%)             | 64 (50.0%)              | 414 (33.2%)              |
| <b>Number of cigarettes smoked per day</b> |                       |                        |                        |                        |                        |                         |                          |
| Median (Q1-Q3)                             | 20 (9.5 - 30)         | 10 (8.0 - 15)          | 20 (10 - 30)           | 17 (10 - 20)           | 16 (11 - 21)           | 15 (15 - 20)            | 16 (10 - 23)             |
| Missing, N                                 | 3                     | 43                     | 2                      | 0                      | 9                      | 119                     | 176                      |
| <b>Years smoked</b>                        |                       |                        |                        |                        |                        |                         |                          |
| Median (Q1-Q3)                             | 34 (20 - 45)          | 44 (36 - 50)           | 40 (29 - 48)           | 44 (37 - 53)           | 36 (29 - 42)           | 38 (28 - 43)            | 40 (30 - 47)             |
| Missing, N                                 | 0                     | 24                     | 0                      | 1                      | 6                      | 17                      | 48                       |
| <b>Quit years*</b>                         |                       |                        |                        |                        |                        |                         |                          |
| Median (Q1-Q3)                             | 23 (9.5 - 33)         | 13 (5.6 - 20)          | 15 (6.3 - 27)          | 8.0 (3.0 - 18)         | 12 (5.4 - 22)          | 9.6 (4.0 - 19)          | 15 (6.0 - 27)            |
| Missing, N                                 | 0                     | 17                     | 0                      | 0                      | 2                      | 5                       | 24                       |
| <b>Education</b>                           |                       |                        |                        |                        |                        |                         |                          |
| Less than grade 12                         | 19 (8.41%)            | 153 (53.5%)            | 133 (63.9%)            | 146 (81.1%)            | 94 (55.6%)             | 86 (68.3%)              | 631 (52.8%)              |
| high-school graduate                       | 54 (23.9%)            | 99 (34.6%)             | 47 (22.6%)             | 28 (15.6%)             | 50 (29.6%)             | 21 (16.7%)              | 299 (25.0%)              |
| Above high school                          | 153 (67.7%)           | 34 (11.9%)             | 28 (13.5%)             | 6 (3.33%)              | 25 (14.8%)             | 19 (15.1%)              | 265 (22.2%)              |
| Missing, N                                 | 2                     | 38                     | 0                      | 0                      | 11                     | 2                       | 53                       |
| <b>BMI</b>                                 |                       |                        |                        |                        |                        |                         |                          |
| Median (Q1-Q3)                             | 26 (23 - 28)          | 26 (23 - 28)           | 27 (24 - 30)           | 23 (20 - 25)           | 26 (23 - 29)           | 26 (23 - 28)            | 25 (23 - 28)             |
| Missing, N                                 | 2                     | 4                      | 0                      | 0                      | 0                      | 2                       | 8                        |
| <b>History of cancer</b>                   | 3 (1.32%)             | 15 (4.81%)             | 30 (14.4%)             | 0 (0%)                 | 0 (0%)                 | 0 (NA)                  | 48 (4.33%)               |
| Missing, N                                 | 0                     | 12                     | 0                      | 0                      | 0                      | 128                     | 140                      |
| <b>Family history of cancer</b>            | 18 (7.89%)            | 0 (NA%)                | 22 (20.8%)             | 0 (NA)                 | 0 (NA)                 | 0 (NA)                  | 40 (12.0%)               |
| Missing, N                                 | 0                     | 324                    | 102                    | 180                    | 180                    | 128                     | 914                      |
| <b>COPD</b>                                | 20 (8.77%)            | 23 (14.0%)             | 0 (NA)                 | 0 (NA)                 | 0 (NA)                 | 0 (NA)                  | 43 (11.0%)               |
| Missing, N                                 | 0                     | 160                    | 208                    | 180                    | 180                    | 128                     | 856                      |

\*Only former smokers

**Supplementary Table 2.** 500 bootstrap internal validation and external validation of PLCOm2012 model and Protein marker model in 6 datasets. Using the protein panels selected by themselves.

| Training dataset              | Internal validation: Mean AUC (SD) |                          | Testing dataset | External validation: AUC (95% CI) |                          |
|-------------------------------|------------------------------------|--------------------------|-----------------|-----------------------------------|--------------------------|
|                               | PLCOm2012 model                    | Protein-based risk model |                 | PLCOm2012 model                   | Protein-based risk model |
| EPIC, HUNT, MCCS, NSHDS, SCHS | 0.59 (0.03)                        | 0.71 (0.03)              | CPS             | 0.63 (0.55 to 0.70)               | 0.77 (0.71 to 0.83)      |
| CPS, HUNT, MCCS, NSHDS, SCHS  | 0.59 (0.03)                        | 0.73 (0.03)              | EPIC            | 0.70 (0.62 to 0.77)               | 0.71 (0.63 to 0.78)      |
| CPS, EPIC, MCCS, NSHDS, SCHS  | 0.62 (0.03)                        | 0.74 (0.03)              | HUNT            | 0.55 (0.49 to 0.62)               | 0.70 (0.64 to 0.76)      |
| CPS, EPIC, HUNT, NSHDS, SCHS  | 0.59 (0.03)                        | 0.74 (0.02)              | MCCS            | 0.68 (0.60 to 0.75)               | 0.68 (0.61 to 0.75)      |
| CPS, EPIC, HUNT, MCCS, NSHDS  | 0.62 (0.03)                        | 0.73 (0.03)              | SCHS            | 0.53 (0.45 to 0.62)               | 0.71 (0.63 to 0.78)      |
| CPS, EPIC, HUNT, MCCS, SCHS   | 0.61 (0.03)                        | 0.71 (0.03)              | NSHDS           | 0.56 (0.46 to 0.66)               | 0.81 (0.74 to 0.89)      |

**Supplementary Table 3.** 500 bootstrap internal validation and external validation of PLCOm2012 model and Protein marker model in 6 datasets. Using the 4 proteins selected in the main manuscript.

| Training dataset              | Internal validation: Mean AUC (SD) |                          | Testing dataset | External validation: AUC (95% CI) |                          |
|-------------------------------|------------------------------------|--------------------------|-----------------|-----------------------------------|--------------------------|
|                               | PLCOm2012 model                    | Protein-based risk model |                 | PLCOm2012 model                   | Protein-based risk model |
| EPIC, HUNT, MCCS, NSHDS, SCHS | 0.59 (0.03)                        | 0.72 (0.03)              | CPS             | 0.63 (0.55 to 0.70)               | 0.77 (0.71 to 0.83)      |
| CPS, HUNT, MCCS, NSHDS, SCHS  | 0.59 (0.03)                        | 0.73 (0.03)              | EPIC            | 0.70 (0.62 to 0.77)               | 0.72 (0.64 to 0.79)      |
| CPS, EPIC, MCCS, NSHDS, SCHS  | 0.62 (0.03)                        | 0.73 (0.03)              | HUNT            | 0.55 (0.49 to 0.62)               | 0.70 (0.64 to 0.75)      |
| CPS, EPIC, HUNT, NSHDS, SCHS  | 0.59 (0.03)                        | 0.72 (0.03)              | MCCS            | 0.68 (0.60 to 0.75)               | 0.72(0.65 to 0.79)       |
| CPS, EPIC, HUNT, MCCS, NSHDS  | 0.62 (0.03)                        | 0.72 (0.03)              | SCHS            | 0.53 (0.45 to 0.62)               | 0.72 (0.65 to 0.80)      |
| CPS, EPIC, HUNT, MCCS, SCHS   | 0.61 (0.03)                        | 0.71 (0.03)              | NSHDS           | 0.56 (0.46 to 0.66)               | 0.81 (0.74 to 0.89)      |

**Supplementary Table 4.** AUC of PLCOm2012 model and protein-based risk model in the validation set by stratifying the histology.

| Models                                    | Number<br>Of cases | Number<br>Of controls | PLCOm2012 model     | Protein-based risk model |
|-------------------------------------------|--------------------|-----------------------|---------------------|--------------------------|
|                                           |                    |                       | AUC (95% CI)        | AUC (95% CI)             |
| <b>Histology subtype and all controls</b> |                    |                       |                     |                          |
| Adenocarcinoma                            | 50                 | 154                   | 0.60 (0.51 to 0.69) | 0.77 (0.69 to 0.85)      |
| Small Cell Carcinoma                      | 24                 | 154                   | 0.63 (0.52 to 0.74) | 0.78 (0.69 to 0.88)      |
| Squamous Cell<br>Carcinoma                | 26                 | 154                   | 0.64 (0.52 to 0.76) | 0.77 (0.66 to 0.88)      |
| Other/NOS                                 | 54                 | 154                   | 0.67 (0.58 to 0.75) | 0.72 (0.64 to 0.80)      |

**Supplementary Table 5.** Comparison of Diagnostic Performance of Protein Algorithm and EarlyCDT®-Lung in the validation set by stratifying the histology.

| Models                                    | Number<br>Of cases | Number<br>Of controls | EarlyCDT-Lung test      |                         | PLCOm2012 model          |                         | Protein-based risk<br>model |
|-------------------------------------------|--------------------|-----------------------|-------------------------|-------------------------|--------------------------|-------------------------|-----------------------------|
|                                           |                    |                       | Sensitivity<br>(95% CI) | P<br>value <sup>#</sup> | Sensitivity*<br>(95% CI) | P<br>value <sup>†</sup> | Sensitivity*<br>(95% CI)    |
| <b>Histology subtype and all controls</b> |                    |                       |                         |                         |                          |                         |                             |
| Adenocarcinoma                            | 50                 | 154                   | 6% (0 to 13)            | 0.000012                | 28% (16 to 40)           | 0.03                    | 48% (34 to 62)              |
| Small Cell Carcinoma                      | 24                 | 154                   | 21% (4.6 to 37)         | 0.03                    | 12% (0 to 26)            | 0.02                    | 50% (30 to 70)              |
| Squamous Cell Carcinoma                   | 26                 | 154                   | 15% (1.5 to 29)         | 0.002                   | 38% (20 to 57)           | 0.12                    | 58% (39 to 77)              |
| Other/NOS                                 | 54                 | 154                   | 17% (6.7 to 27)         |                         | 35% (22 to 48)           | 0.24                    | 46% (33 to 60)              |

\*Sensitivities for the PLCOm2012 model and Protein-based risk model were estimated by adjusting the cut-off of each respective risk model that yielded the same specificity as the EarlyCDT®-Lung test which was estimated at 86% in the overall smoking-matched control population and varied between 84% and 90% depending on the strata.

<sup>#</sup>p value for the sensitivity difference between Protein-based risk model and EarlyCDT®-Lung at the same specificity level.

<sup>†</sup>p value for the sensitivity difference between Protein-based risk model and PLCOm2012 model at the same specificity level.

**Supplementary Figure 1.** Proportion of proteins selected by the LASSO logistic regression model during 500 resampling for a set number of targeted proteins. Proteins selected more than 400 times are marked as black. 1A: target 6-protein model; 1B: target 7-protein model; 1C: target 9-protein model; 1D: target 10-protein model.

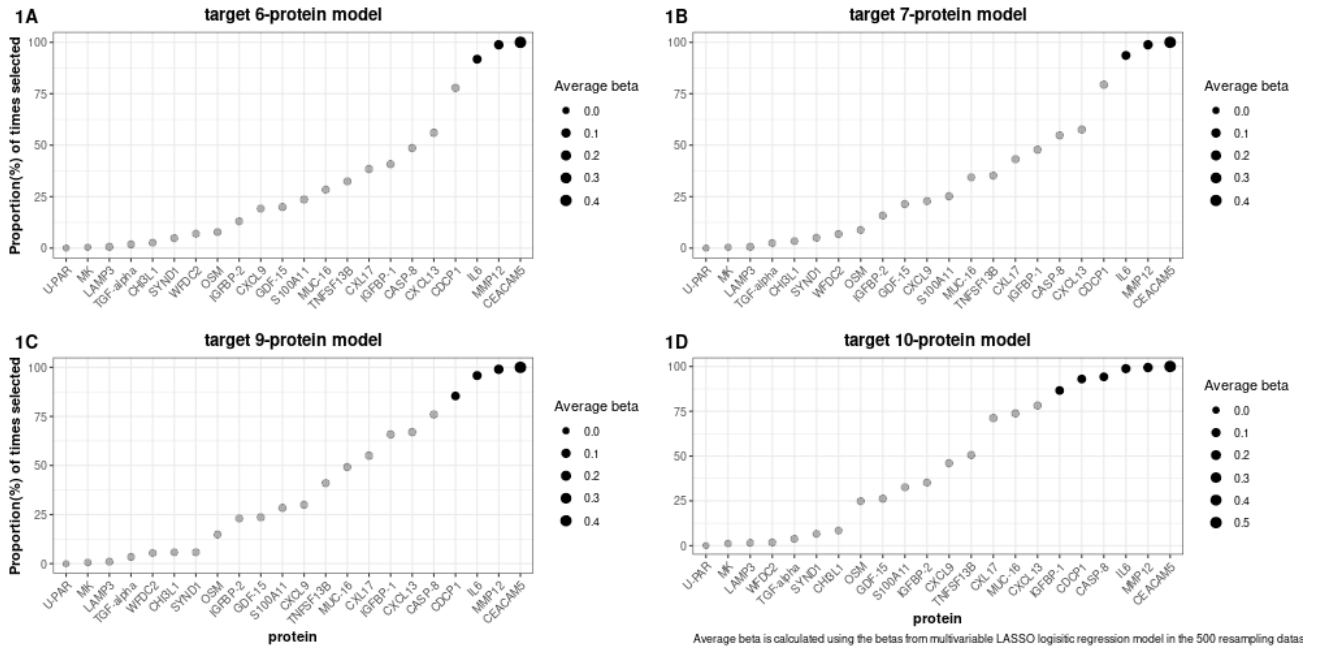

**Supplementary Figure 2.** Proportion of proteins selected by the LASSO logistic regression model during 500 resampling in 6 development datasets. Proteins selected more than 400 times are marked as black. 2A: EPIC, HUNT, MCCS, NSHDS, SCHS; 2B: CPS, HUNT, MCCS, NSHDS, SCHS; 2C: CPS, EPIC, MCCS, NSHDS, SCHS; 2D: CPS, EPIC, HUNT, NSHDS, SCHS; 2E: CPS, EPIC, HUNT, MCCS, NSHDS; 2F: CPS, EPIC, HUNT, MCCS, SCHS.

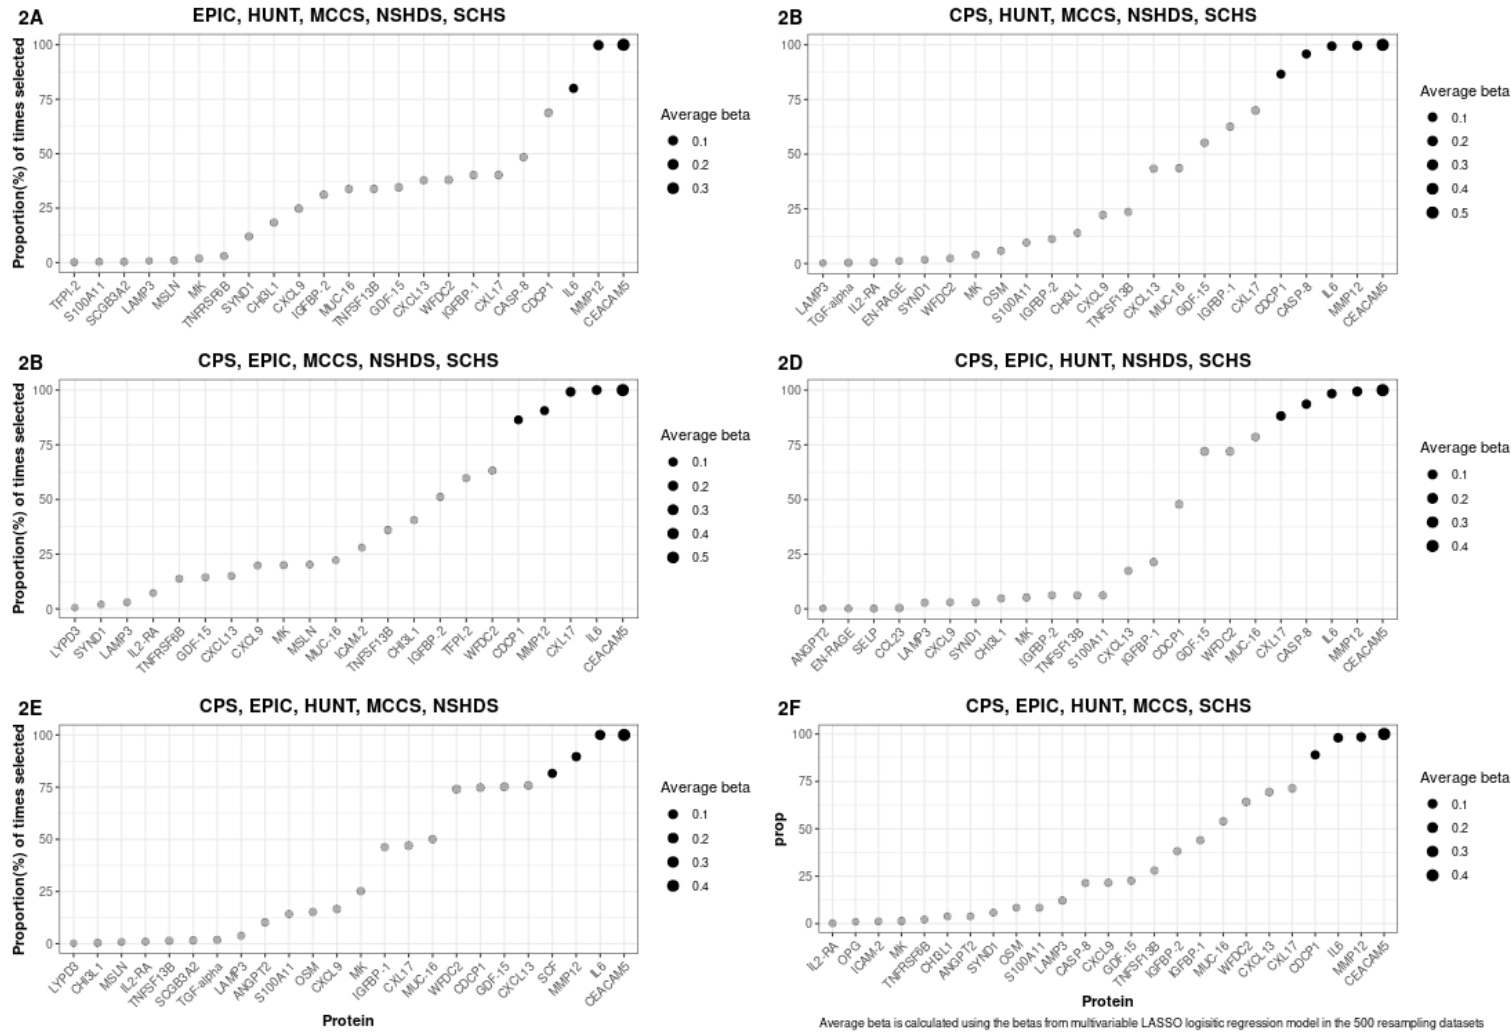

Supplement: djad071_supplementary_data.pdf [file djad071_supplementary_data.pdf]
